# Supplementary material for: Microwave-assisted catalytic allylation of aldehydes promoted by a mesoporous silica-supported BINOL ligand in solid media
Source: Royal Society of Chemistry journal article supplement (doi:10.1039/b803111h), 2008-01-01

## Supporting Information for

### **Microwave-assisted catalytic allylation of aldehydes promoted by a mesoporous silica-supported BINOL ligand in solid media**

Guohua Liu<sup>\*</sup>, Mei Yao, Jianyao Wang, Xiaoquan Lu, Mouming Liu, Fang Zhang, Hexing Li<sup>\*</sup>

Department of Chemistry, Shanghai Normal University, Shanghai 200234, P. R. China

#### **Experimental**

##### **1. General Methods.**

###### ***1.1. Materials and general methods.***

All experiments, which are sensitive to moisture or air, were carried out under an Ar atmosphere using standard Schlenk techniques. THF were distilled from sodium benzophenone ketyl, and dichloromethane from calcium hydride. Aldehydes and i-PrOH was distilled before use. Commercial reagents were used without further purification unless otherwise noted. Triblock PEO-PPO-PEO copolymer **P123** [HO(CH<sub>2</sub>CH<sub>2</sub>O)<sub>20</sub>(CH<sub>2</sub>CH(CH<sub>3</sub>)O)<sub>70</sub>(CH<sub>2</sub>-CH<sub>2</sub>O)<sub>20</sub>H], 3-(chloropropyl)triethoxysilane, BINOL, Titanium(IV) isopropoxide, HMDS [N(SiMe<sub>3</sub>)<sub>2</sub>] and aldehydes were purchased from Sigma-Aldrich Company Ltd. and used as received. SBA-15 (pore size 7.6 nm) and was synthesized and characterized as described in our previous reports ( a) Li, H. X.; Zhang, F.; Wan, Y.; Lu, Y. F. *J. Phys. Chem. B*: **2006**, *110*, 22942. b) Wan, Y.; Zhang, F.; Lu, Y. F.; Li, H. X. *J. Mol. Catal. A: Chem.* **2007**, *267*, 165. c) Wan, Y.; Chen, J.; Zhang, D. Q.; Li, H. X. *J. Mol. Catal. A: Chem.* **2006**, *258*, 89). 6-Hydroxymethyl-2,2'-bis(methoxymethyl)-1,1'-binaphthol **1** was readily prepared following our previous procedure from commercially available BINOL (Liu, G. H.; Tang, W. J.; Fan, Q. H. *Tetrahedron*, **2003**, *59*, 8603). The representative aromatic aldehydes were chosen as model substrates to test the heterogeneous ligand. The retention times was determined by comparing the retention times with those of commercially available substituted phenyl homoallylic alcohols and ketones. HPLC was performed on a

Shimadzu SPD-10AVP with a UV-Vis detector and chiral separations were performed using Kromasil 100-5-TBB chiralcel columns ( $\Phi 0.46 \times 25$  cm).

## 1.2. Characterization

The X-ray powder diffraction (XRD) experiments were carried out on a Rigaku D/Max-RB diffractometer with Cu K $\alpha$  radiation. Transmission electron microscopy (TEM) studies were performed on a JEOL JEM2010 electron microscope, operated at an acceleration voltage of 200 kV. Fourier transform infrared (FTIR) spectra were collected with a Nicolet Magna 550 spectrometer by using the KBr method. N<sub>2</sub> adsorption isotherms were measured at 77 K with a Quantachrome Nova 4000 analyzer. The samples were measured after being outgassed at 423 K overnight. Pore size distributions were calculated by using the BJH model. The specific surface areas ( $S_{\text{BET}}$ ) of samples were determined from the linear parts of BET plots ( $p/p_0 = 0.05$ -0.95). TG-DTA curves were recorded on a Perkin Elmer 7-series thermogravimetric analyzer. The  $^{29}\text{Si}$  CP/MAS NMR and  $^{13}\text{C}$  CP/MAS NMR spectra were recorded at 79.5 and 100.6 MHz, respectively, using a Bruker AV-400 spectrometer.

## 2. Synthetic procedures.

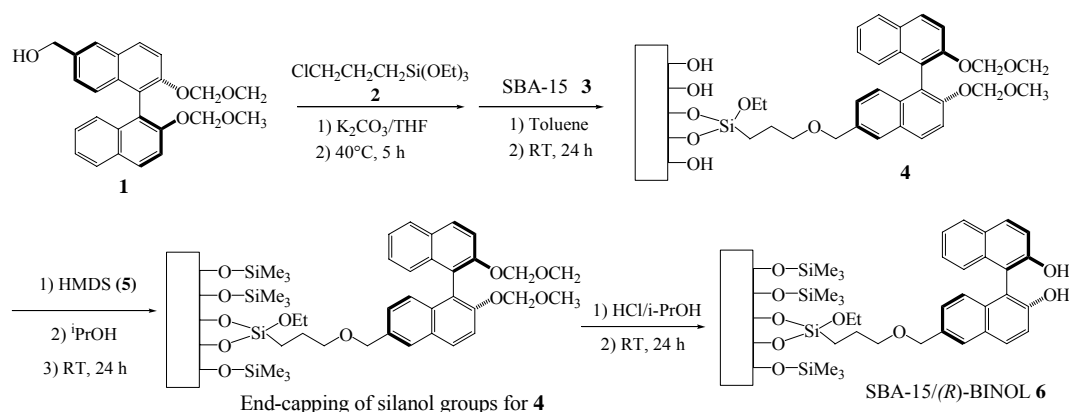

### 2.1. Preparations of the mesoporous silica-supported chiral ligand.

**2.1.1.** Immobilization of modified BINOL on mesoporous silicas **4**: The typical procedures as follows: Under argon atmosphere, to a stirred suspension of **1** (0.20 g, 0.50 mmol) and K<sub>2</sub>CO<sub>3</sub> (0.21 g, 1.50 mmol) in 10 mL dry THF was added dropwise a solution of 3-chloropropyltriethoxysilane (0.12 g, 0.50 mmol) in 2 mL of dry THF at room temperature. The resulting mixture was stirred at 40 °C for 5h. The reaction was

completed by TLC. After filtration and evaporation of most of the solvent, the residues were used directly in following reaction. Then pure siliceous support [SBA-15 (pore size of 7.6), 1.0 g] was dehydrated at 125 °C under 0.01 Torr for 4 h before the addition of the fresh above-products in dry toluene (25 mL). The resulting mixture was stirred and refluxed for 24 h under Argon atmosphere, during which time the BINOL derivatives were grafted onto the supports. After being cooled, filtrated, and washed thoroughly with toluene and C<sub>2</sub>H<sub>5</sub>OH : CH<sub>2</sub>Cl<sub>2</sub> (v:v = 1:1), the solid was dried at 60 °C under reduced pressure overnight to afford the mesoporous ligand **4** (1.18 g, 56.3% relative to **1**) in the form of a white powder (Scheme 1). IR (KBr) cm<sup>-1</sup>: 3449 (m), 2983 (w), 2915 (w), 1642 (w), 1458 (w), 1078 (s), 961 (w), 806 (w), 573 (w), 456 (s). Anal. Found: C, 10.62; H, 1.77%.

**2.1.2.** End-capping of silanol groups (trimethylsilylation) of **4**: Under argon atmosphere, a suspension of **4** (1.15 g) and HMDS [(CH<sub>3</sub>)<sub>3</sub>Si]<sub>2</sub>N] (5 mL, 0.025 mol) in 25 mL dry toluene were stirred overnight. The volatiles were stripped on a rotary evaporator and the dry powder was washed three times with 10 mL of dry acetone by centrifugation and finally dried under vacuum at 60 °C for 6 h to afford **5** (1.63 g, 96.0% relative to **4**) in the form of a white powder (Scheme 1). IR (KBr) cm<sup>-1</sup>: 3480 (w), 2964 (w), 1663 (m), 1635 (b), 1563 (w), 1455 (w), 1078 (s), 857 (b), 805 (w), 710 (w), 657 (w), 582 (w), 462 (m). Anal. Found: C, 26.69; H, 3.63%.

**2.1.3.** Removal of the MOM-protected groups **6**: Under argon atmosphere, to a stirred suspension of **5** (0.80 g) in 5 mL CH<sub>2</sub>Cl<sub>2</sub> was added a solution of <sup>i</sup>PrOH/HCl (6.0 N, 5 mL). After stirring overnight at room temperature and evaporation most of the solvent, the residue was diluted with CH<sub>2</sub>Cl<sub>2</sub> and washed with an aqueous saturated solution of NaHCO<sub>3</sub>. The resulting solid was filtered off, washed successively with water, acetone, and CH<sub>2</sub>Cl<sub>2</sub>, and finally dried at 60 °C under vacuum for 10 h. The mesoporous ligand **6** is in the form of a white powder (0.69 g). IR (KBr) cm<sup>-1</sup>: 3431 (s), 3076 (w), 2964 (w), 2924 (w), 1657 (m), 1510 (w), 1444 (w), 1388 (w), 1320 (w), 1088 (s), 952 (w), 848 (m), 804 (w), 756 (w), 694 (w), 565 (w), 461 (m) cm<sup>-1</sup>. (IR spectrum was shown in Fig.S1); Anal. Found: C 23.42, H 2.91; S<sub>BET</sub>: 214 m<sup>2</sup>/g, V<sub>pore</sub>: 0.41 cm<sup>3</sup>/g, d<sub>pore</sub>: 3.5 nm; <sup>29</sup>Si MAS/NMR (300 MHz): Q<sup>4</sup> (δ = -113 ppm), T<sup>2</sup> (δ = -63 ppm) and T<sup>3</sup> (δ = -71 ppm); <sup>13</sup>C CP/MAS (161.9 MHz): 128.7, 50.5, 45.6, 26.3, 10.0 and 0.1 ppm; Nitrogen

adsorption-desorption isotherms of SBA-15 (**3**) and SBA-15/BINOL (**6**), the TEM images of **6**, the powder XRD patterns of SBA-15 (**3**) and SBA-15/BINOL (**6**) and the TG and DTA of SBA-15/BINOL (**6**) were shown in Fig.S2-S5.

### **3. General Procedure for Catalytic Allylation of Aldehydes**

**3.1** General Procedure for Catalytic Allylation of Aldehydes under microwave irradiation in solid media. Under argon atmosphere,  $\text{Ti}(\text{OiPr})_4$  (4.47  $\mu\text{L}$ , 0.015 mmol) was added to a suspension of SBA-15/BINOL (**6**) [17 mg, 0.015 mmol BINOL, 10 mol% (ligand to benzaldehyde)] in 2 mL of  $^i\text{PrOH}$  at room temperature and the mixture was stirred at ambient temperature for 10 min. After being filtrated, the solids were transferred to a thick walled Pyrex tube followed by the addition of tetraallyltin (9.52  $\mu\text{L}$ , 0.041 mmol) and benzaldehyde (15.22  $\mu\text{L}$ , 0.15 mmol). The tube was positioned in a MAS-1 single mode cavity microwave from Sineo Microwave Chemistry Technology (China) Co., LTD, Shanghai, producing continuous irradiation at 2.45 GHz, and the mixture was irradiated with 700W for 15 minutes. Then 2 mL of ethyl acetate was added. After being filtrated, the solid was washed several times with ethyl acetate, which were employed directly for recycling-experiments. The mother liquid was were dried over  $\text{Na}_2\text{SO}_4$  and concentrated. The residue was further purified by flash column chromatography on silica gel (eluent:  $\text{Et}_2\text{O}$ ) to afford 1-phenyl-3-buten-1-ol as a colorless liquid.

**3.2** General Procedure for Catalytic Allylation of Aldehydes in Solvent Conditions. Under argon atmosphere,  $\text{Ti}(\text{OiPr})_4$  (4.47  $\mu\text{L}$ , 0.015 mmol) was added to a suspension of SBA-15/BINOL (**6**) [17 mg, 0.015 mmol BINOL, 10 mol% (ligand to benzaldehyde)] in 2 mL of  $^i\text{PrOH}$  (or water) at room temperature and the mixture was stirred at ambient temperature for 10 min followed by the addition of tetraallyltin (9.52  $\mu\text{L}$ , 0.041 mmol) under stirring., After 10 min, benzaldehyde (15.22  $\mu\text{L}$ , 0.15 mmol) was added with a microsyringe at ambient temperature. The reaction mixture was allowed to stir for 12h. The reaction mixture was quenched with 2.0 mL of 1.0N hydrochloric acid solution. After being filtrated, the mother liquid was extracted with 1.0 mL of ethyl acetate. The combined organic layers were dried over  $\text{Na}_2\text{SO}_4$  and concentrated. The residue was further purified by flash column chromatography on silica gel (eluent:  $\text{Et}_2\text{O}$ ) to afford 1-phenyl-3-buten-1-ol as a colorless liquid.

**Figure S1.** FTIR spectra of SBA-15 and **4-6**.

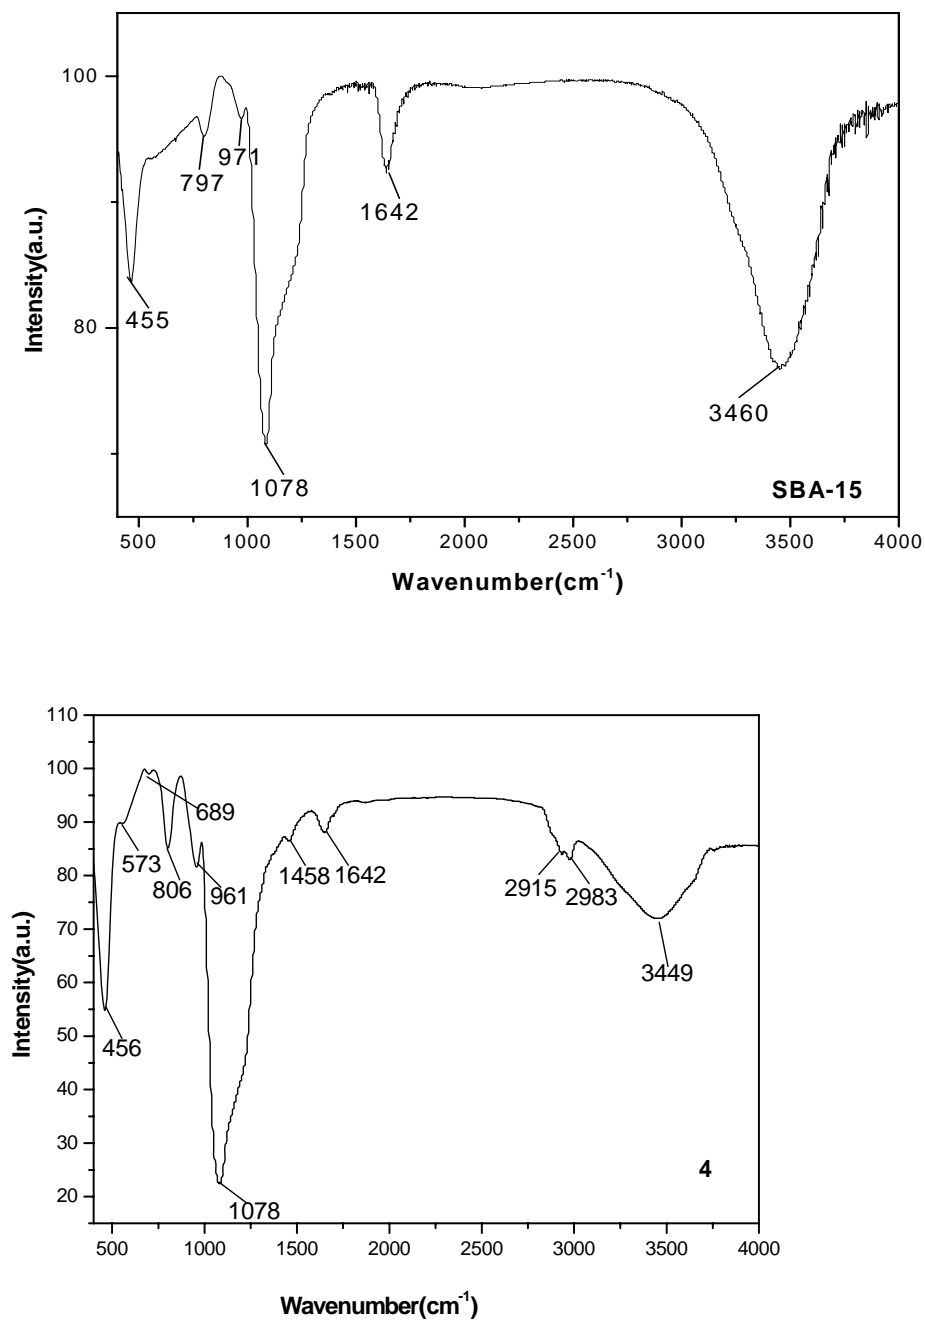

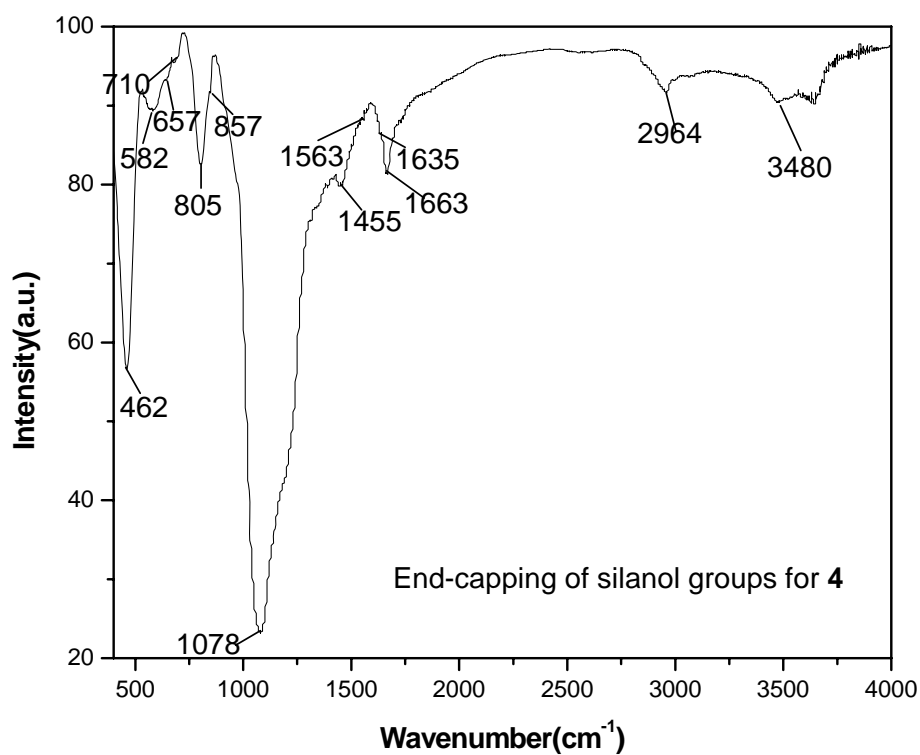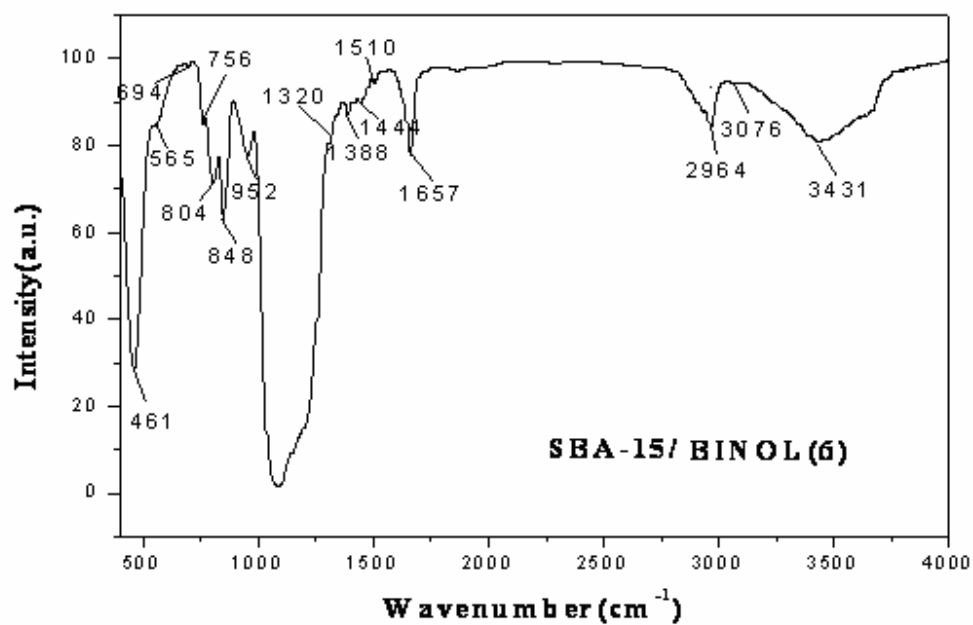

**Figure S2a.** Nitrogen adsorption-desorption isotherms of SBA-15 (**3**) and SBA-15/BINOL (**6**).

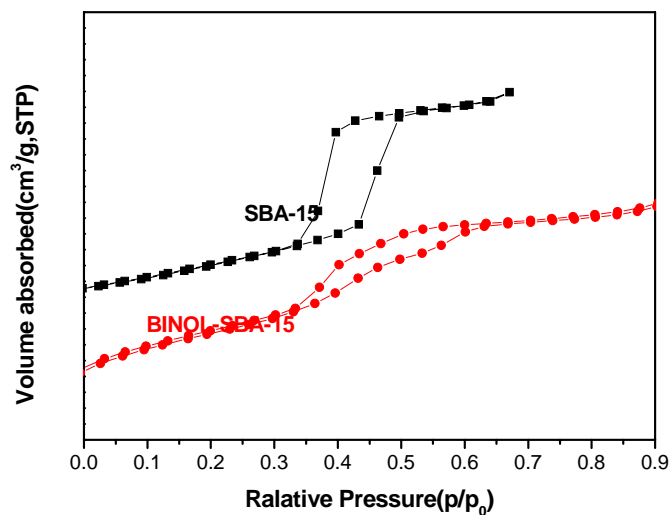

**Figure S2b.** Nitrogen adsorption-desorption isotherms and pore size distributions of SBA-15/BINOL (**6**) after recycling-experiments.

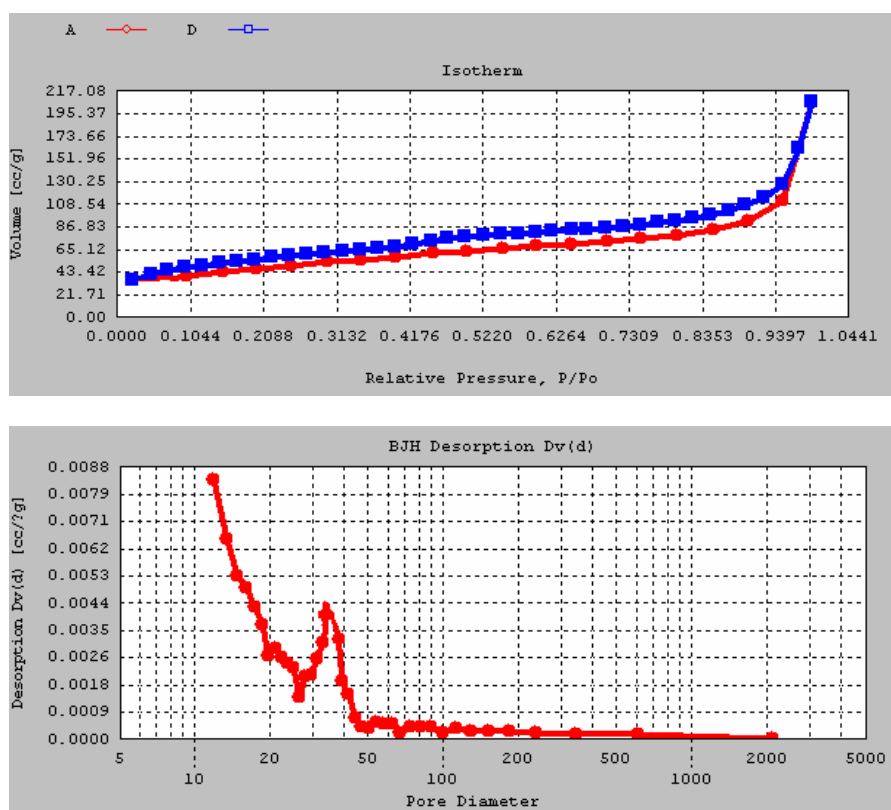

**Figure S3.** The powder XRD patterns of SBA-15 (**3**) and SBA-15/BINOL (**6**).

SBA-15 (**3**)

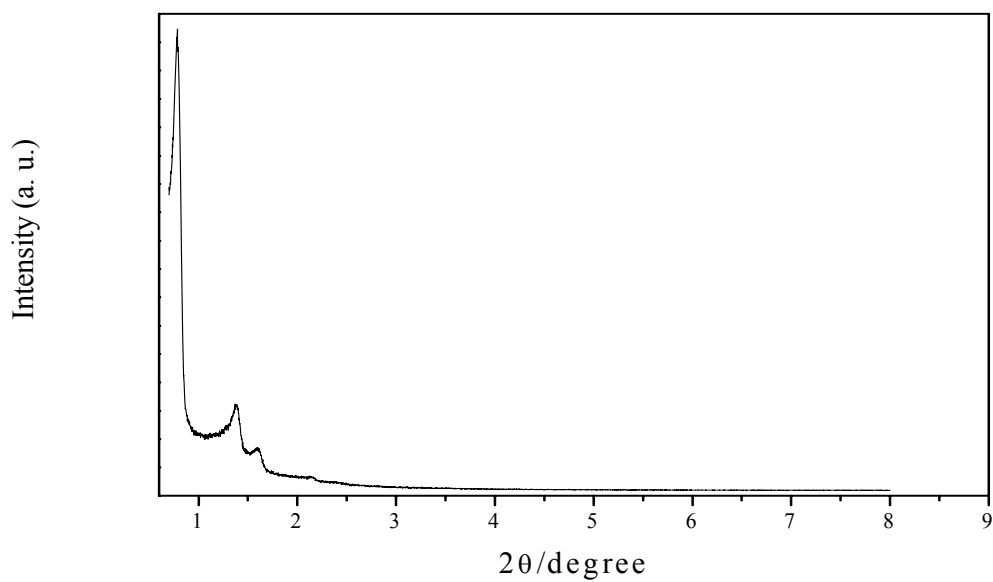

SBA-15/BINOL (**6**).

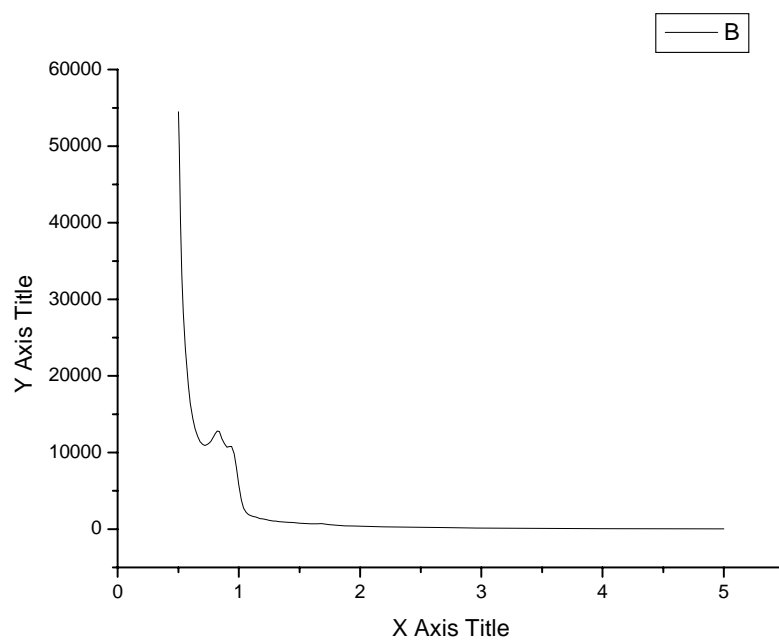



**Figure S4.** The TEM images of SBA-15/BINOL (**6**) viewed along [100] and [001] directions.

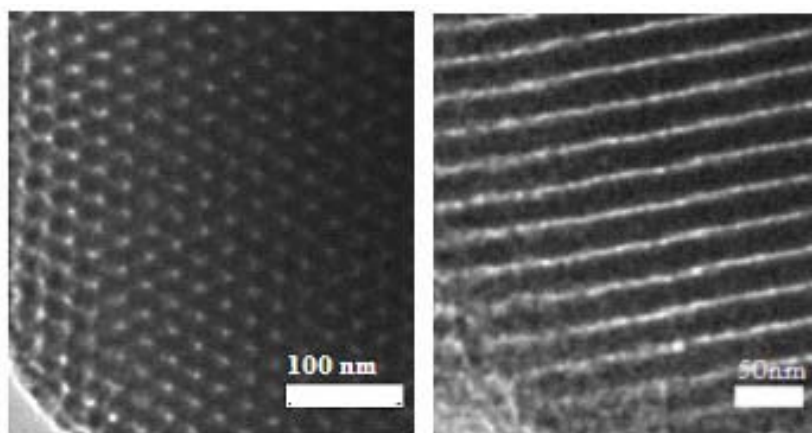

**Figure S5.** The TG and DTA of SBA-15/BINOL (**6**).

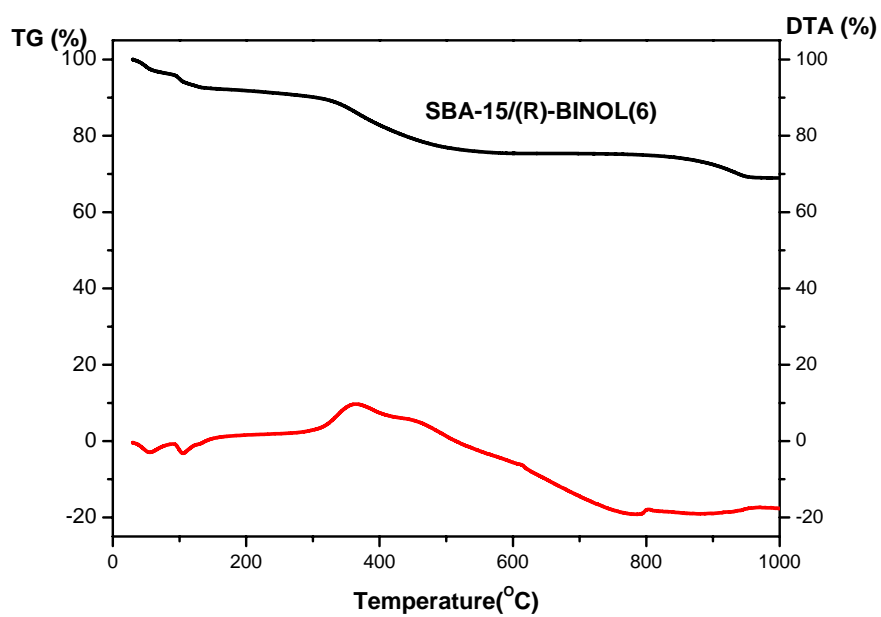

**Figure S6** The Conversion of products on the basis of start material (aldehydes) and selectivity determined by HPLC peak area integration at 210 nm using a Shimadzu SPD-10AVP with a UV-Vis detector and the separations were performed using Kromasil 100-5-TBB chiralcel columns ( $\Phi 0.46 \times 25$  cm).

**Compound 7a:** (Kromasil 100-5-TBB: 1.0 mL/min, hex/IPA=99:1). Benzaldehyde:  $t$ : 4.3 min.

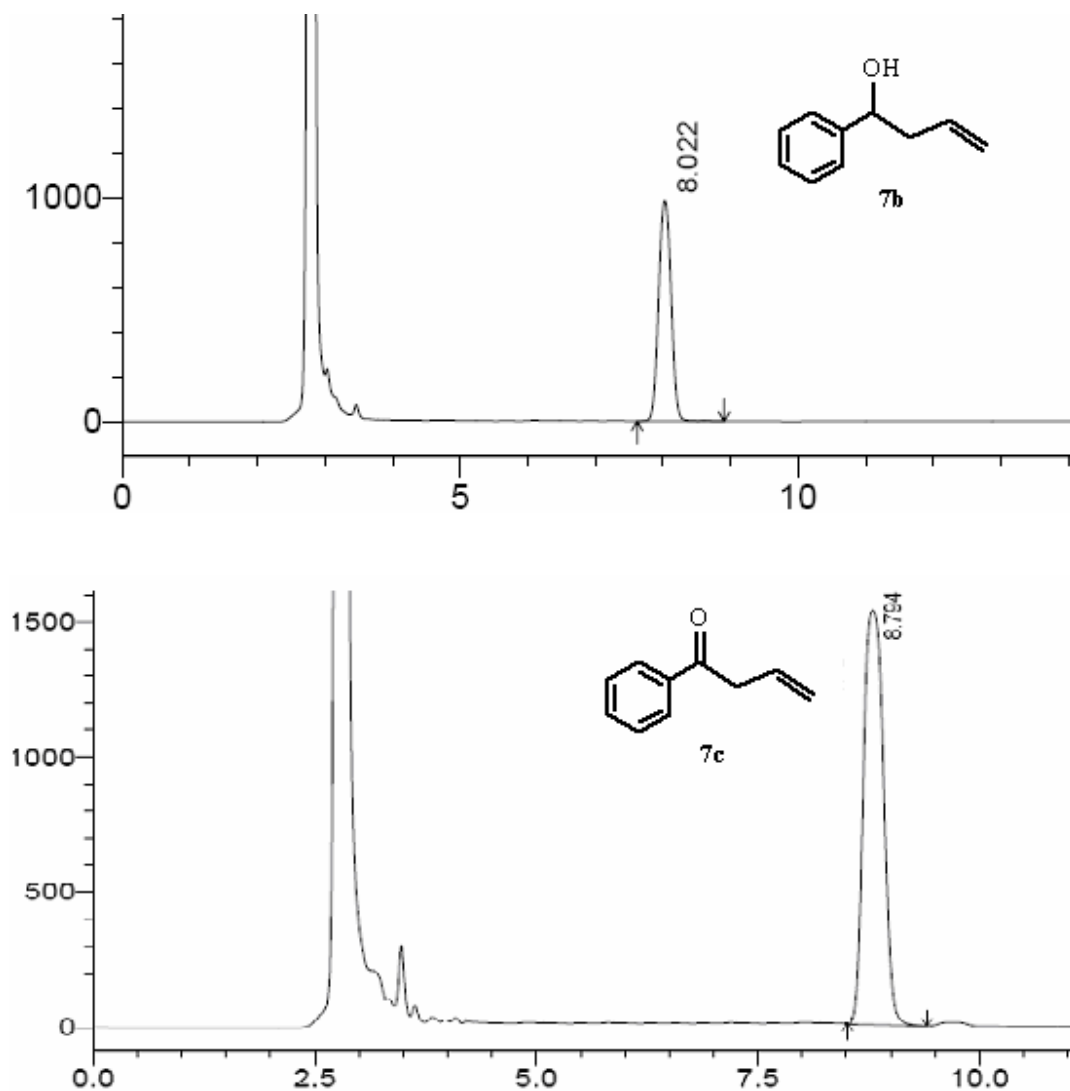

Data were obtained using **6** as catalyst and **7a** as a substrate.

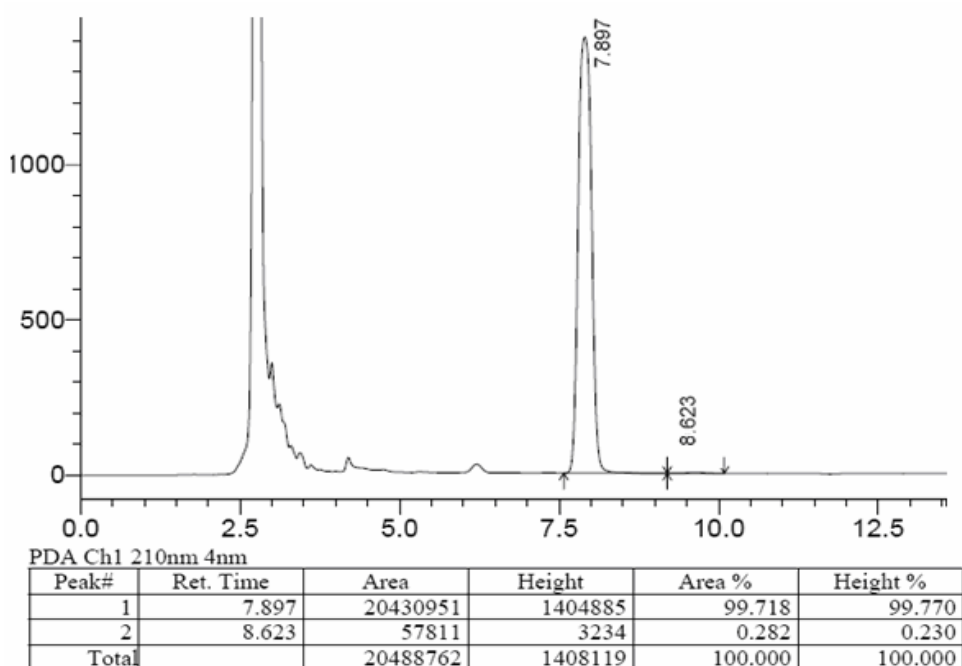

Data were obtained with 5% mol of **6** using **7a** as a substrate.

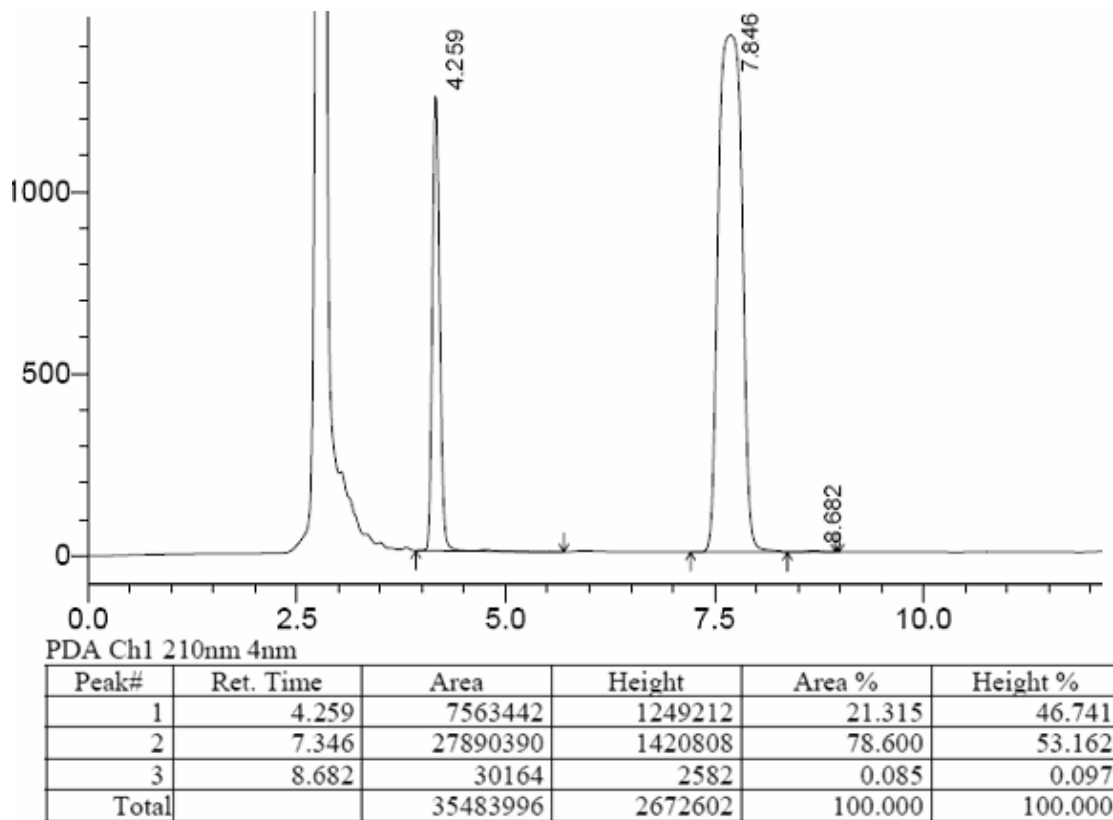

Data were obtained using 10% mol of BINOL as ligand and **7a** as a substrate.

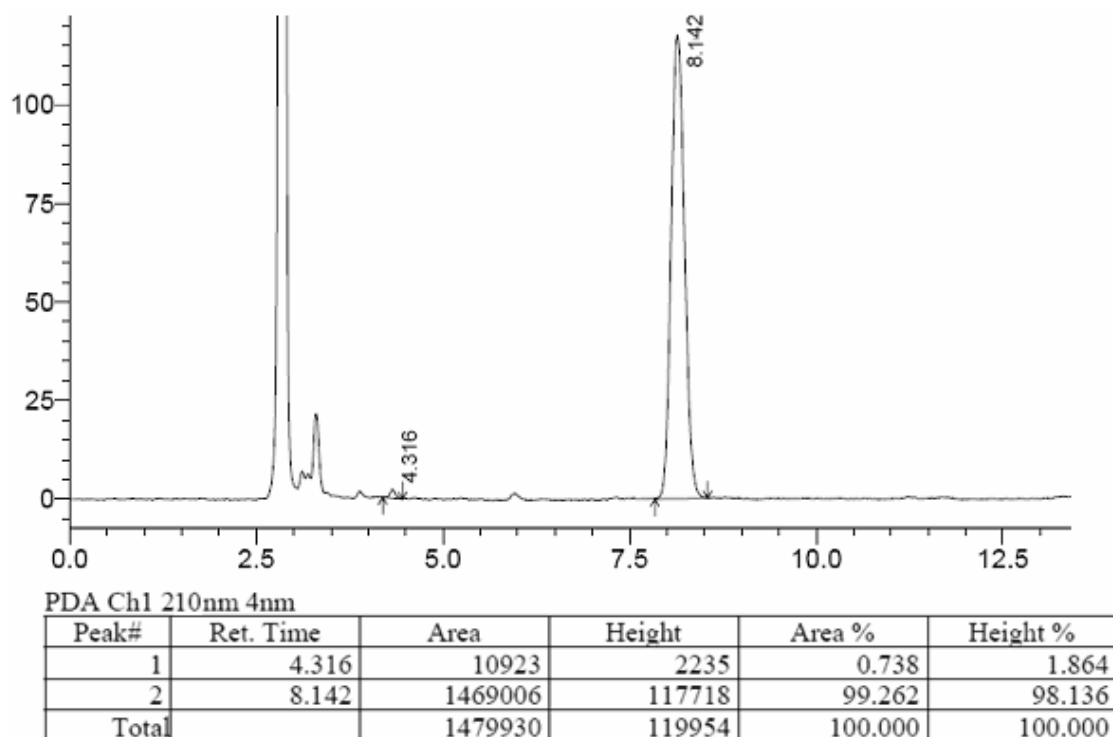

Data were obtained using 10% mol of BINOL plus TM-SBA-15 as ligand and **7a** as substrate.

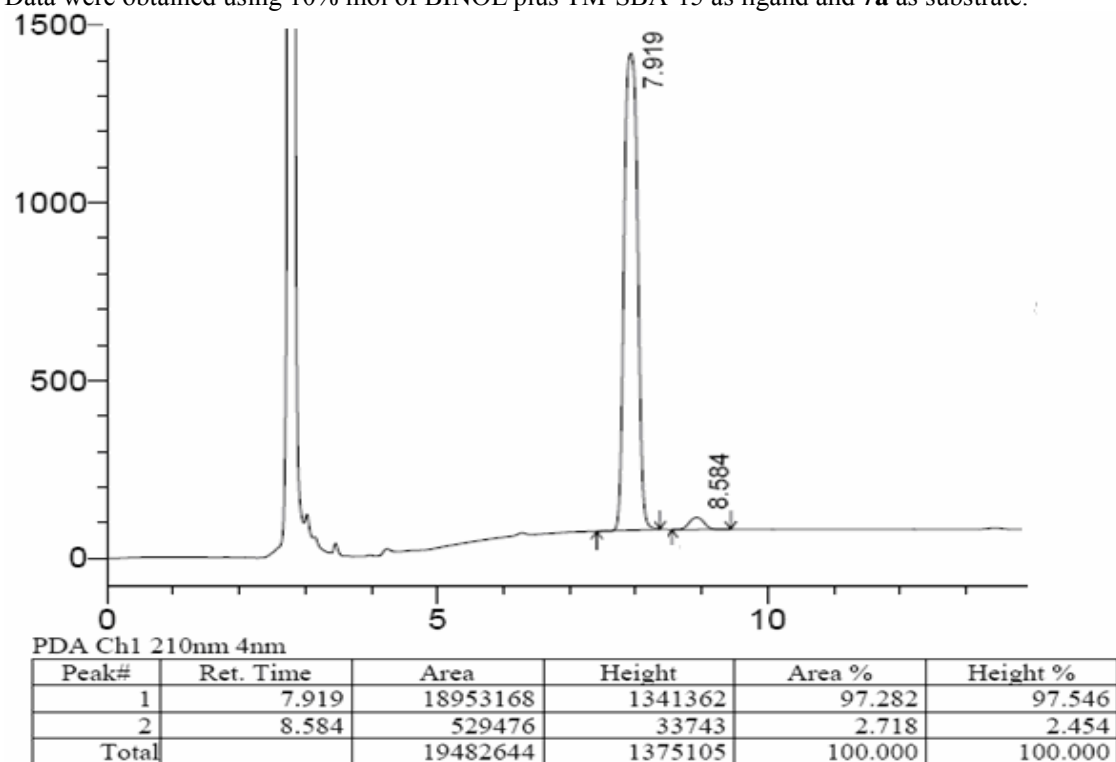

Data were obtained using SBA-15 as ligand and **7a** as a substrate.

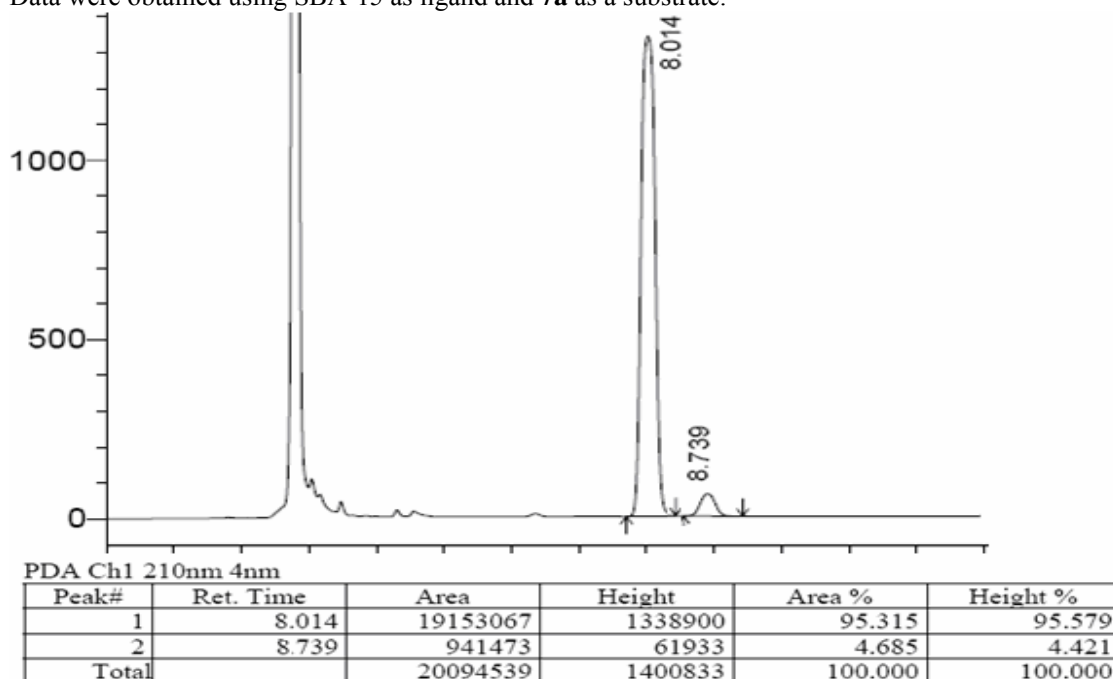

Data were obtained without titanium(IV) isopropoxide using **7a** as a substrate.

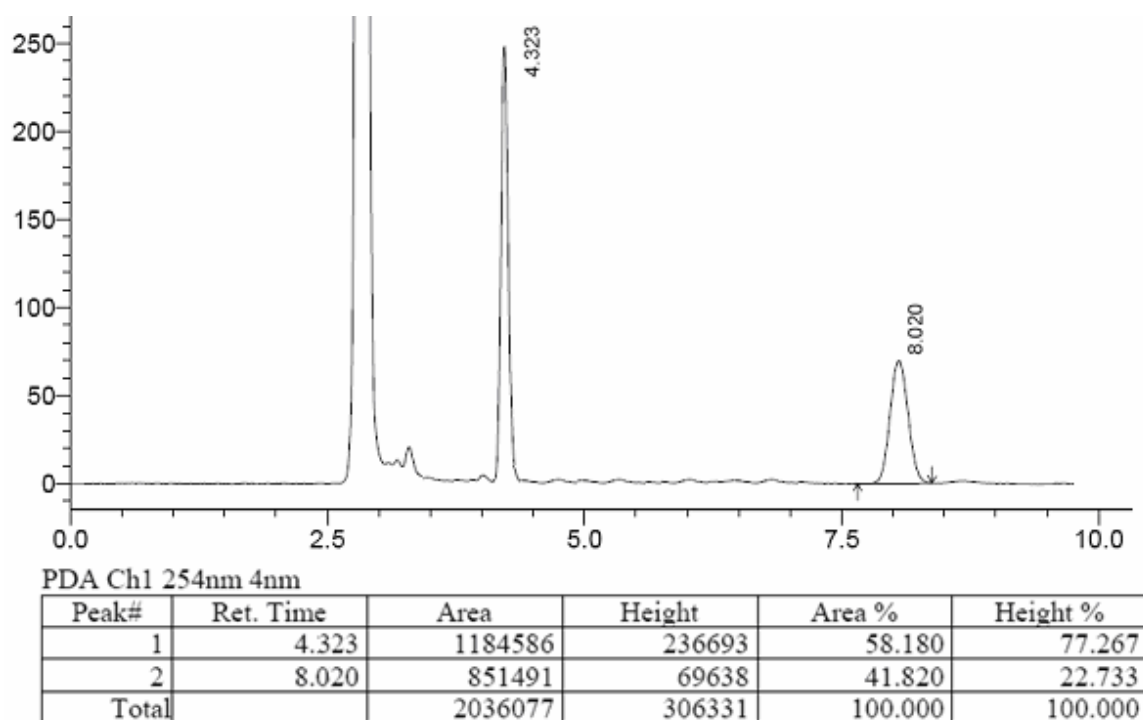

Data were obtained using isopropoxide as solvent and **7a** as a substrate.

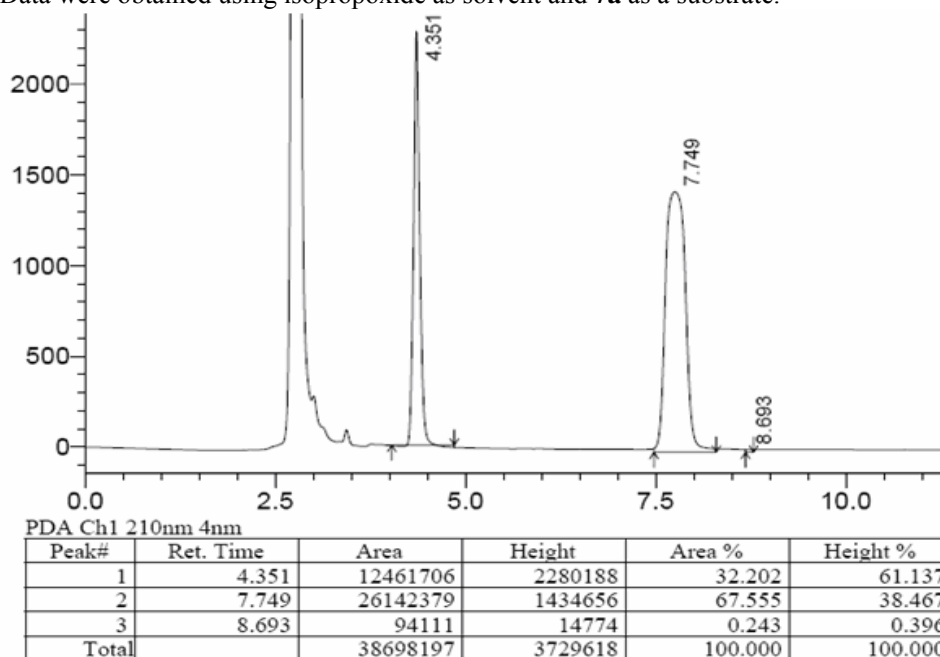

Data were obtained using water as solvent and **7a** as a substrate.

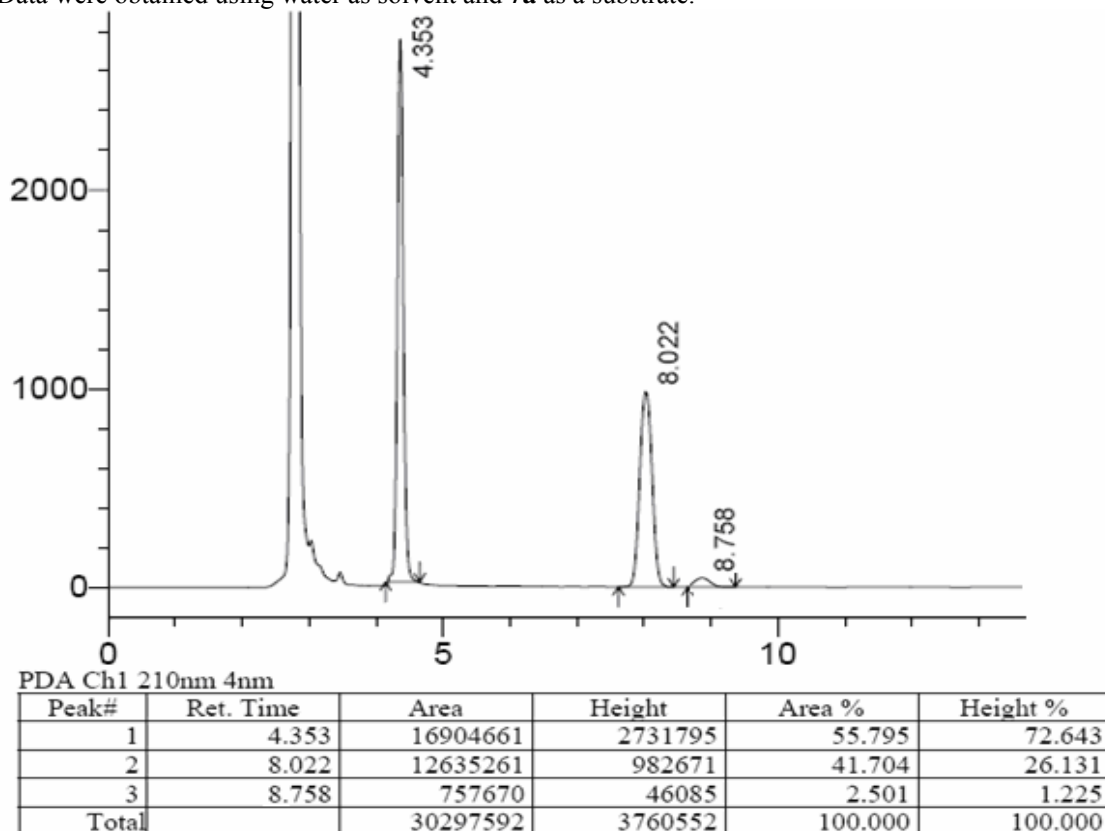

**Compound 8a:** (Kromasil 100-5-TBB: 1.0 mL/min, hex/IPA=97:3). 4-methoxybenzaldehyde: *t*: 5.8 min.

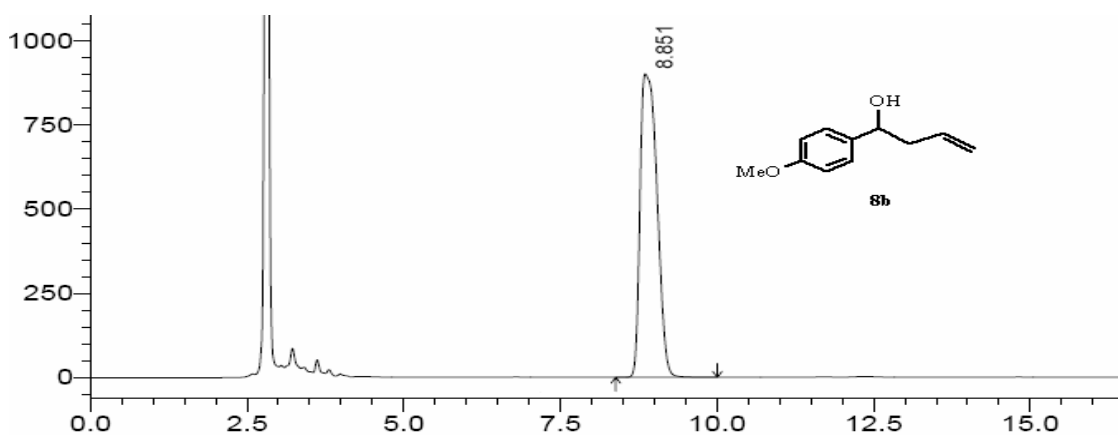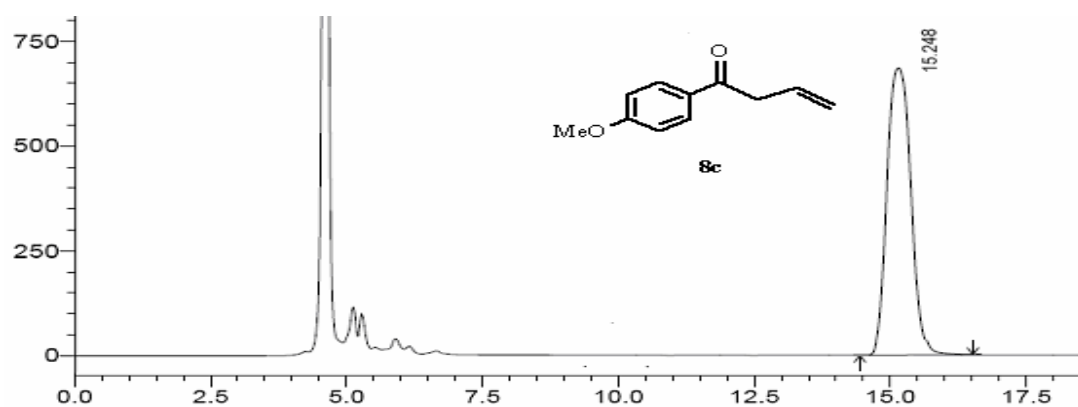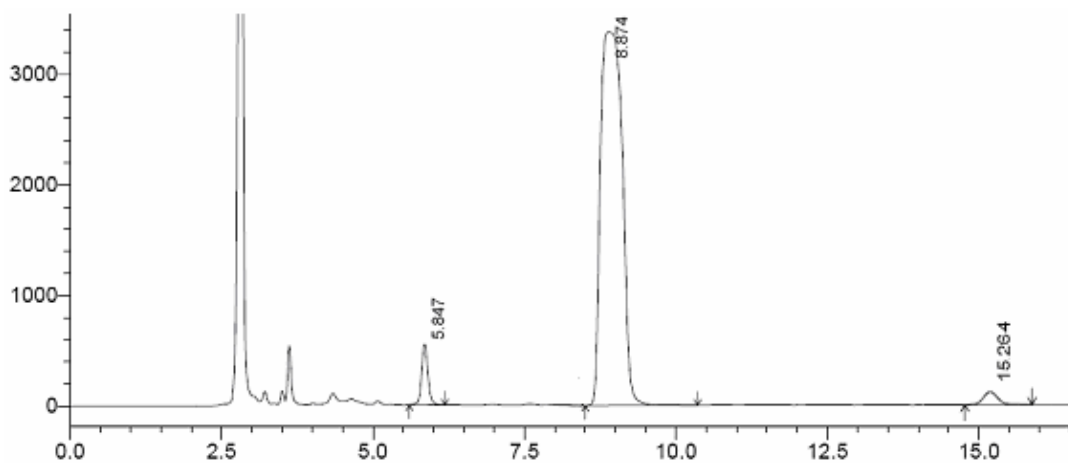

PDA Ch1 220nm 4nm

| Peak# | Ret. Time | Area     | Height  | Area %  | Height % |
|-------|-----------|----------|---------|---------|----------|
| 1     | 5.847     | 2954102  | 511021  | 3.343   | 10.008   |
| 2     | 8.874     | 84167561 | 3377805 | 95.344  | 85.871   |
| 3     | 15.264    | 1155915  | 44760   | 1.312   | 4.121    |
| Total |           | 88277578 | 3933587 | 100.000 | 100.000  |

**Compound 9a:** (Kromasil 100-5-TBB: 0.4mL/min, hex/IPA=99:1). 4-methyl-benzaldehyde: *t*: 10.6

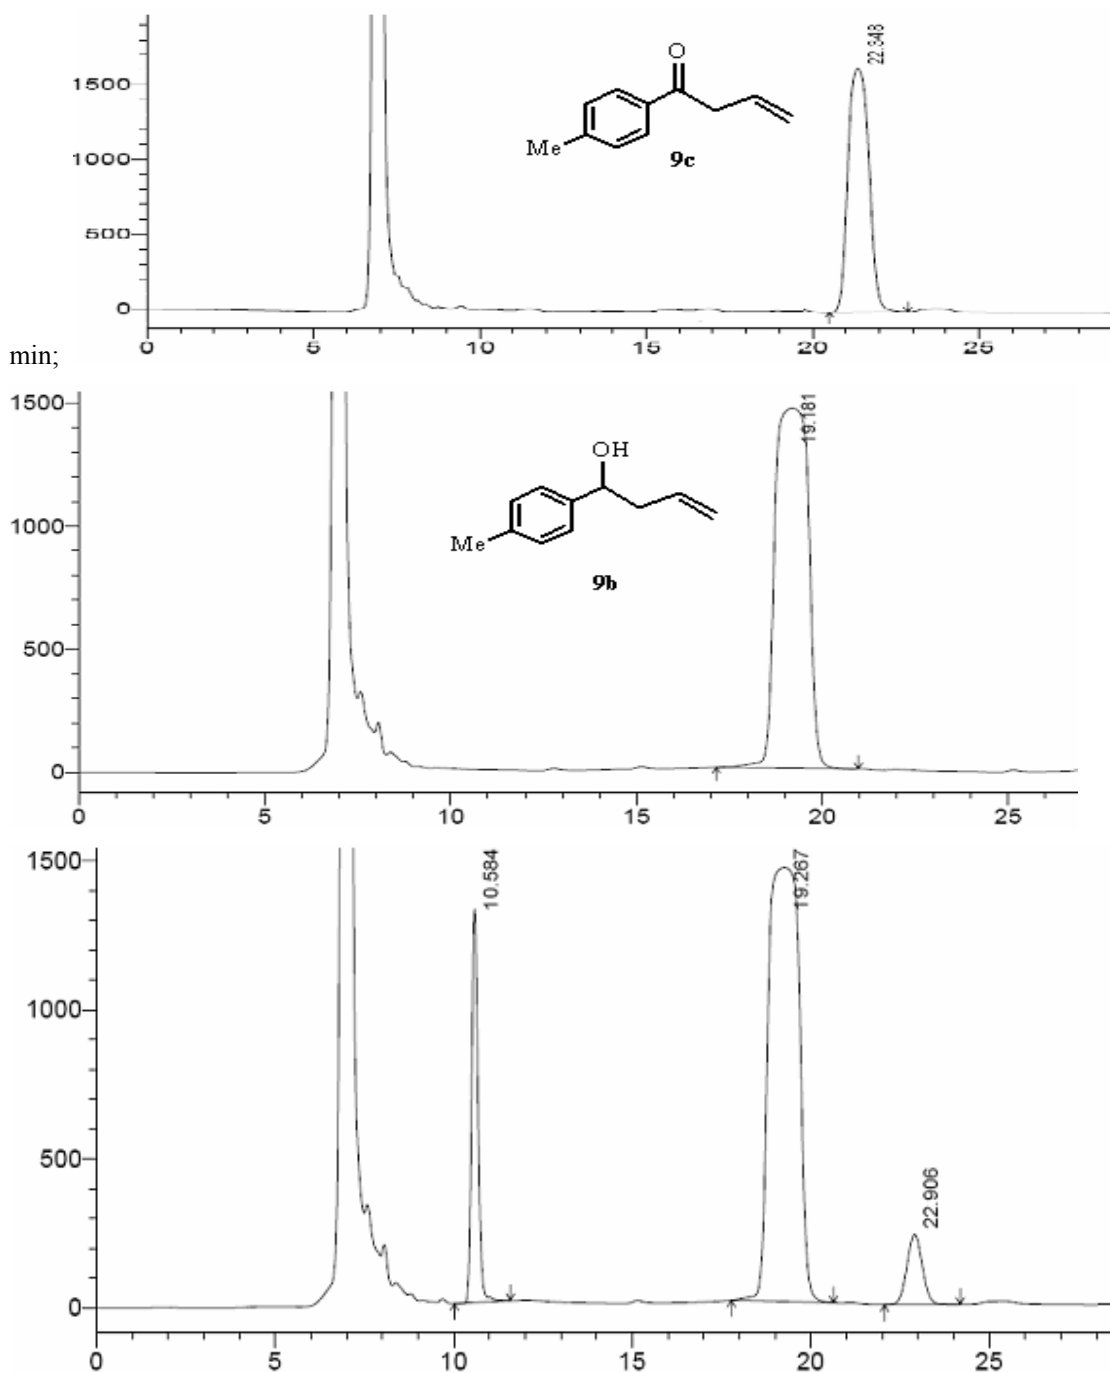

PDA Ch1 220nm 4nm

| Peak# | Ret. Time | Area      | Height  | Area %  | Height % |
|-------|-----------|-----------|---------|---------|----------|
| 1     | 10.584    | 16337560  | 1318539 | 14.885  | 43.828   |
| 2     | 19.267    | 86384924  | 1455222 | 78.703  | 48.372   |
| 3     | 22.906    | 7038187   | 234656  | 6.412   | 7.800    |
| Total |           | 109760670 | 3008417 | 100.000 | 100.000  |



**Compound 10a:** (Kromasil 100-5-TBB: 0.4 mL/min, hex/IPA=99:1). 4-chloro-benzaldehyde: *t*: 12.2 min.

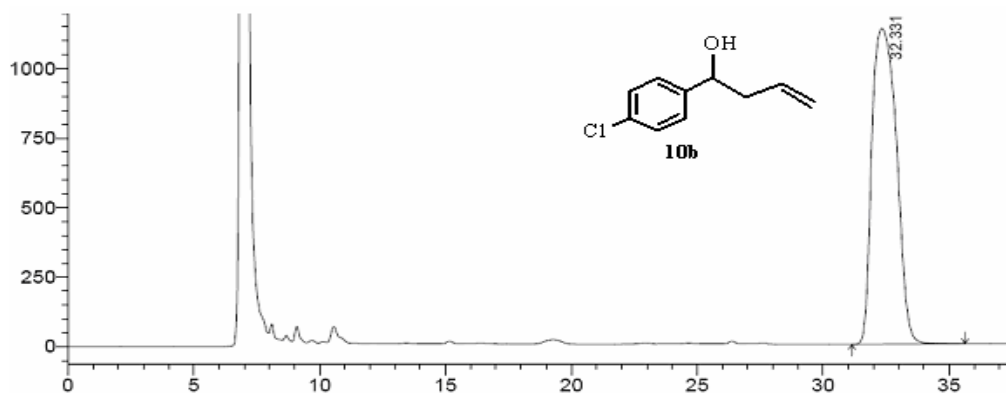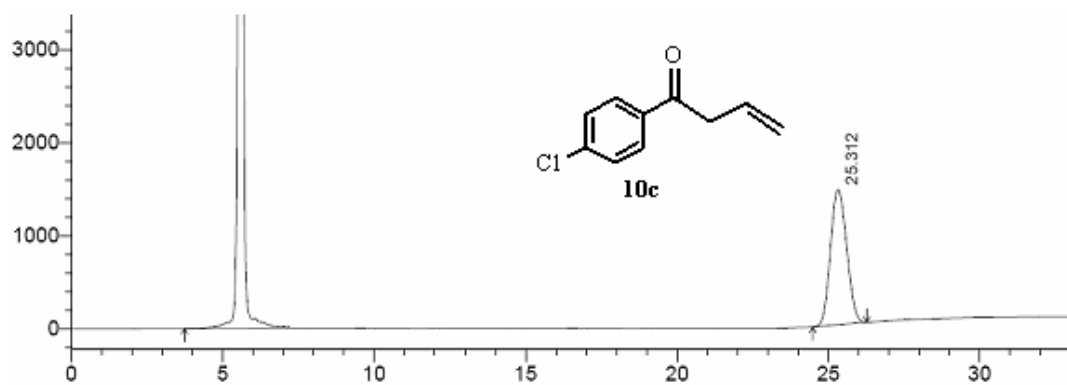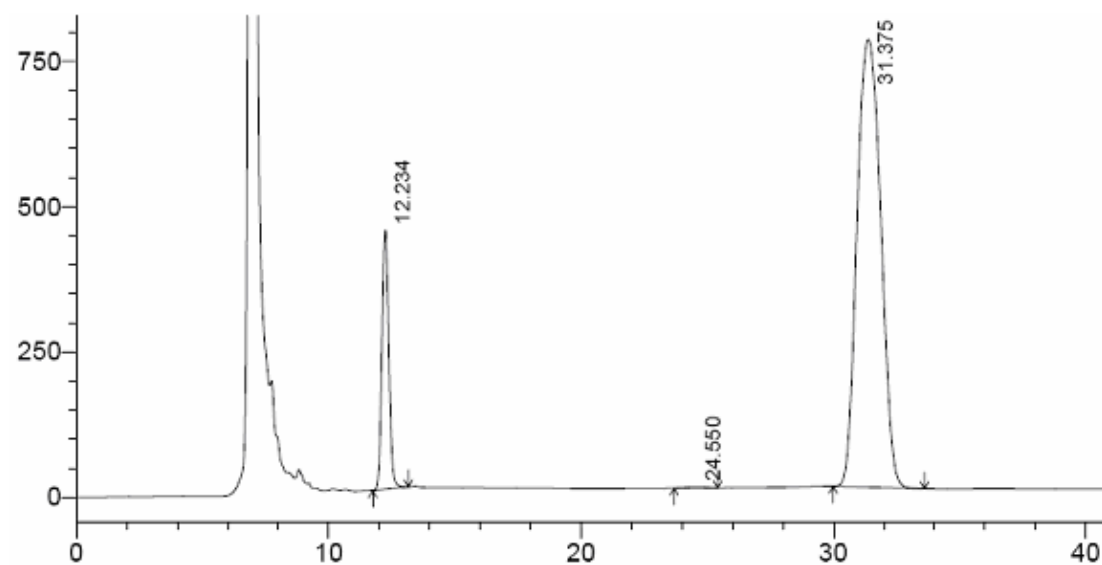

PDA Ch1 230nm 4nm

| Peak# | Ret. Time | Area     | Height  | Area %  | Height % |
|-------|-----------|----------|---------|---------|----------|
| 1     | 12.234    | 8411930  | 445938  | 14.276  | 36.639   |
| 2     | 24.550    | 102632   | 1878    | 0.174   | 0.154    |
| 3     | 31.375    | 50407448 | 769300  | 85.549  | 63.207   |
| Total |           | 58922009 | 1217116 | 100.000 | 100.000  |

**Compound 11a:** (Kromasil 100-5-TBB: 0.5 mL/min, hex/IPA=99:1). 2-chloro-benzaldehyde: *t*: 8.6 min.

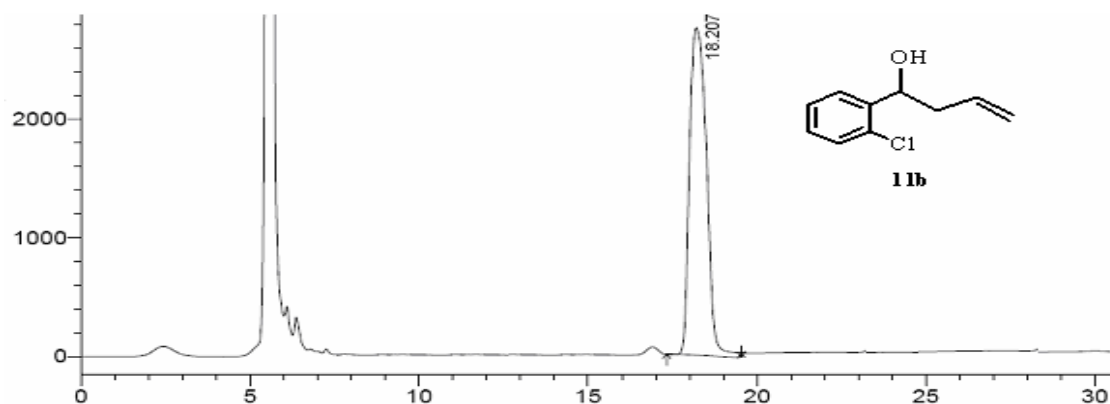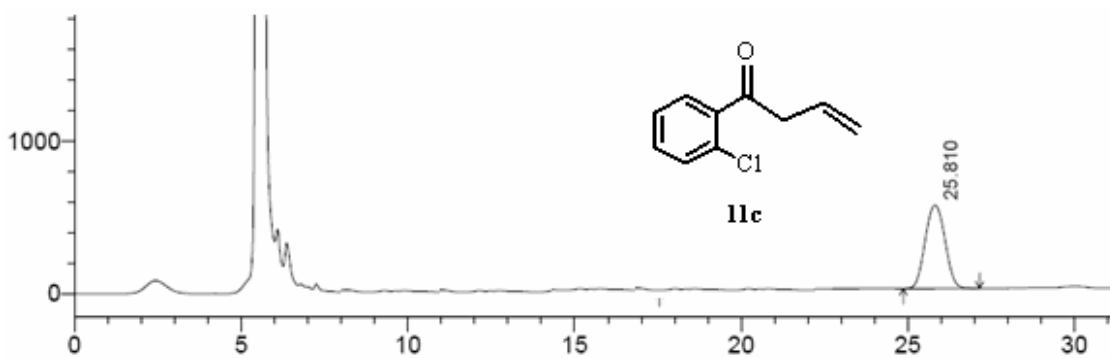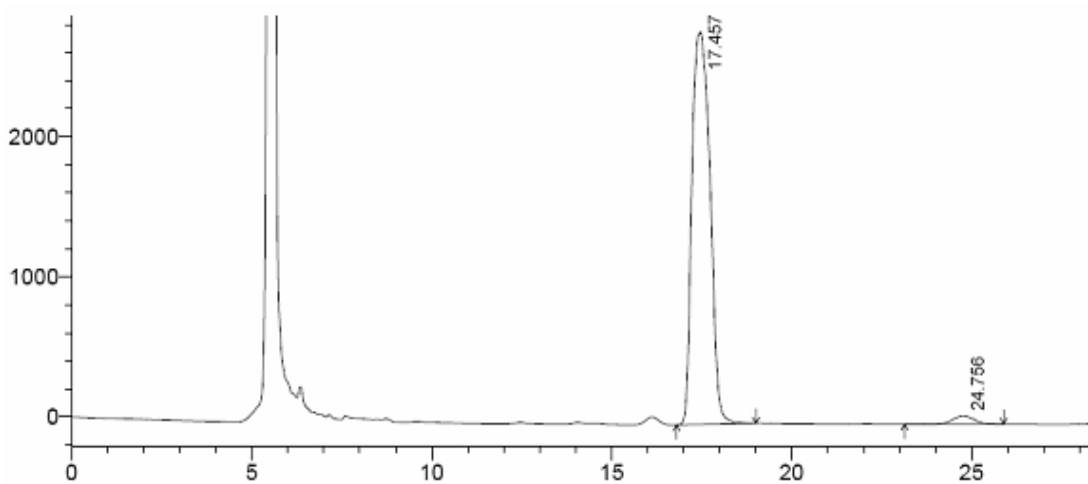

PDA Ch1 207nm 4nm

| Peak# | Ret. Time | Area      | Height  | Area %  | Height % |
|-------|-----------|-----------|---------|---------|----------|
| 1     | 17.457    | 97731208  | 2803988 | 97.652  | 98.012   |
| 2     | 24.756    | 2350279   | 56879   | 2.348   | 1.988    |
| Total |           | 100081487 | 2860866 | 100.000 | 100.000  |

**Recycling-experiment 2:**

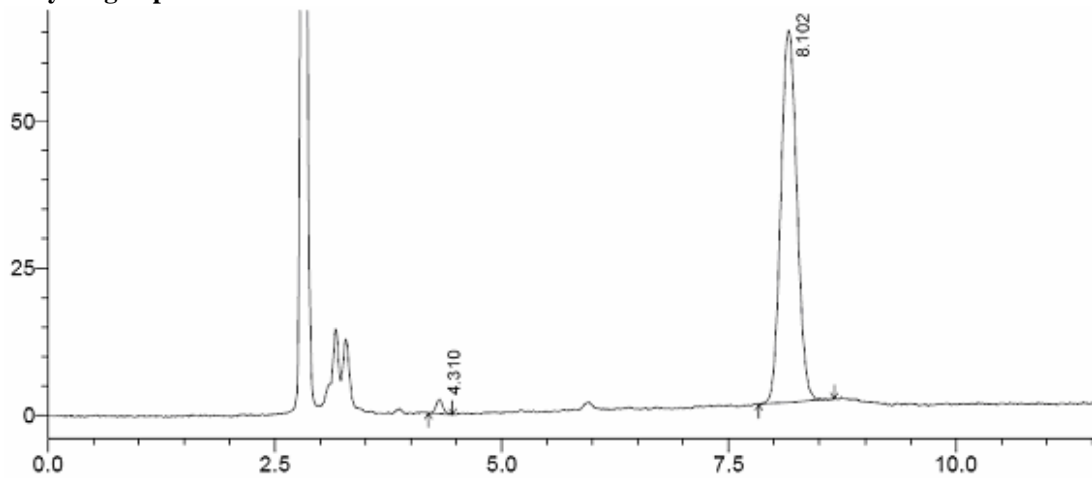

PDA Ch1 210nm 4nm

| Peak# | Ret. Time | Area   | Height | Area %  | Height % |
|-------|-----------|--------|--------|---------|----------|
| 1     | 4.310     | 12975  | 2428   | 1.640   | 3.700    |
| 2     | 8.102     | 778184 | 63184  | 98.360  | 96.300   |
| Total |           | 791159 | 65612  | 100.000 | 100.000  |

**Recycling-experiment 3:**

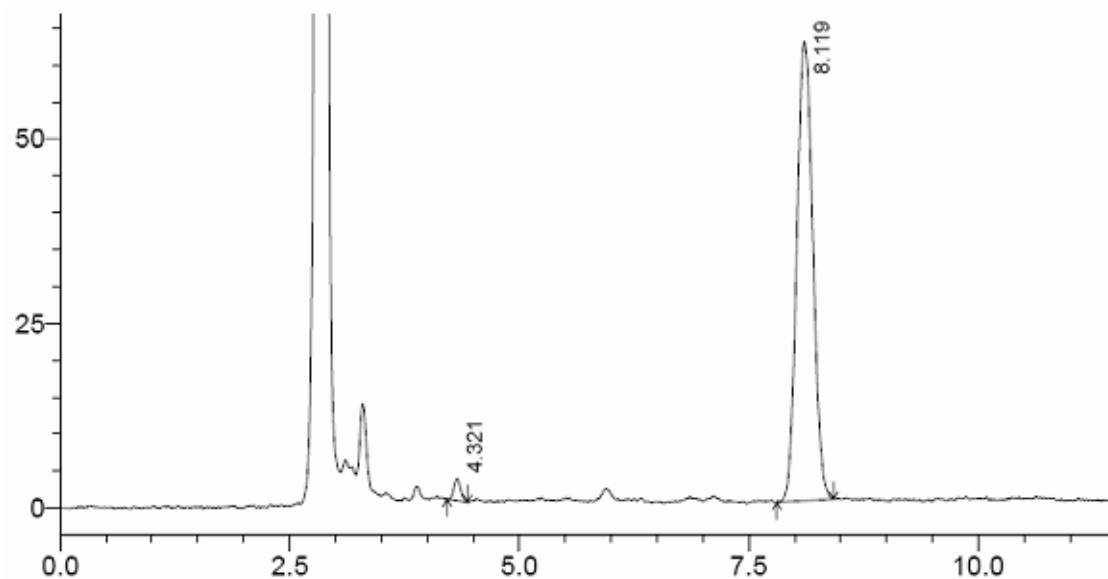

PDA Ch1 210nm 4nm

| Peak# | Ret. Time | Area   | Height | Area %  | Height % |
|-------|-----------|--------|--------|---------|----------|
| 1     | 4.321     | 15224  | 2968   | 1.970   | 4.549    |
| 2     | 8.119     | 757633 | 62281  | 98.030  | 95.451   |
| Total |           | 772857 | 65249  | 100.000 | 100.000  |

#### Recycling-experiment 4:

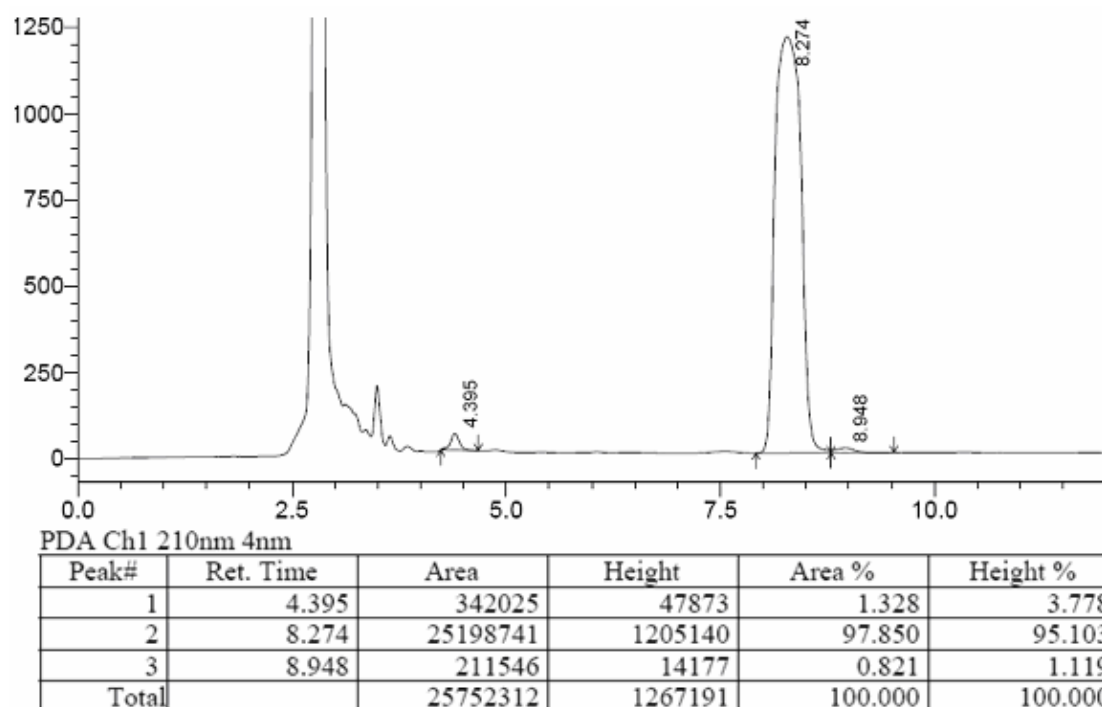

#### Recycling-experiment 5:

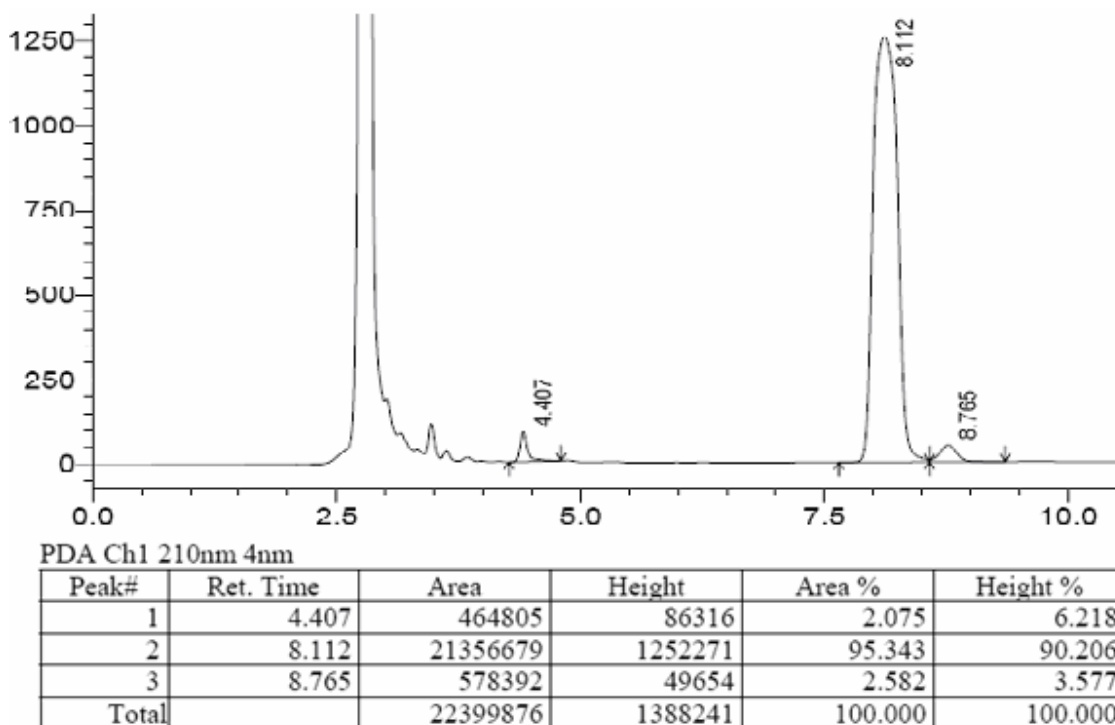

Supplement: b803111h.pdf [file b803111h.pdf]
